# Supplementary material for: A Comparative Analysis of Major Cell Wall Components and Associated Gene Expression in Autotetraploid and Its Donor Diploid Rice (Oryza sativa L.) under Blast and Salt Stress Conditions
Source: MDPI journal article supplement (doi:10.3390/plants12233976), 2023-11-26
Supplement: s1 [file s1]

Supplementary Table S1. Results of GO enrichment of differentially expressed genes related to lignin, cellulose, hemicellulose and pectin in GFD-2X and GFD-4X induced by rice blast fungus stress or salt stress.

Supplementary Table S2. Primers used for qRT-PCR assays.

Supplementary Figure S1. Venn diagrams of differentially expressed genes related to major cell wall components that are specific to GFD-2X (left), specific to GFD-4X (middle), and common to GFD-2X and GFD-4X (right) under the induction of *M. oryzae* stress and salt stress conditions, a-d represents (a) lignin, (b) cellulose, (c) hemicellulose and (d) pectin related genes, respectively.

Supplementary Figure S2. Correlation analysis of lignin and pectin content and expression levels of related genes. a-b respectively denoted in (a) 2X-NaCl vs. 2X-Mock, (b) 4X-*M. oryzae* vs. 4X-Mock, correlation analysis of lignin content and expression levels of related genes. c-e respectively denoted in (c) 2X-*M. oryzae* vs. 2X-Mock, (d) 4X-*M. oryzae* vs. 4X-Mock, (e) 2X-NaCl vs. 2X-Mock, correlation analysis of pectin content and expression levels of related genes. \* and \*\* indicate significant levels of association ( $p < 0.05$  and  $p < 0.01$ ).

Supplementary Figure S3. (a) The results of seven genes expression amplified by qRT-PCR. \* and \*\* indicate the level of significance of differences between treatment and control groups ( $p < 0.05$  and  $p < 0.01$ ) (Student's *t* test). (b) Comparison of RNA-seq results and qRT-PCR analysis of gene expression levels.
