# Supplementary material for: A Comparative Analysis of Major Cell Wall Components and Associated Gene Expression in Autotetraploid and Its Donor Diploid Rice (Oryza sativa L.) under Blast and Salt Stress Conditions
Source: Plants (Basel). 2023 Nov 26;12(23):3976. doi: 10.3390/plants12233976 (PMC10708163; doi:10.3390/plants12233976)
Supplement: Supplementary file 1 [file plants-12-03976-s001.zip]

Archive with 6 entries (6 files):
- Illustrations.pdf
- Supplementary Figure S1.tif
- Supplementary Figure S2.tif
- Supplementary Figure S3.tif
- Supplementary Table S1.xlsx
- Supplementary Table S2.xlsx
