# Supplementary material for: A Comparative Analysis of Major Cell Wall Components and Associated Gene Expression in Autotetraploid and Its Donor Diploid Rice (Oryza sativa L.) under Blast and Salt Stress Conditions
Source: Plants (Basel). 2023 Nov 26;12(23):3976. doi: 10.3390/plants12233976 (PMC10708163; doi:10.3390/plants12233976)
Supplement: Supplementary file 1 [file plants-12-03976-s001.zip › Supplementary Table S1.xlsx]

## Sheet: Supplementary Table 1
differentially expressed gene		1	2	3	4	5	6	7	8	9	10	11	12	13	14	15	16	17	18	19	20	21	22	23	24	25	26	27	28	29	30	31	32	33	34	35	36	37	38	39	40	41	42	43	44	45	46	47	48
LOC_Os10g36848	Os10g0512400	Molecular Function: iron ion binding (GO:0005506);	Biological Process: lignin biosynthetic process (GO:0009809);	Cellular Component: membrane (GO:0016020);	Molecular Function: oxidoreductase activity, acting on paired donors, with incorporation or reduction of molecular oxygen, NAD(P)H as one donor, and incorporation of one atom of oxygen (GO:0016709);	Molecular Function: heme binding (GO:0020037);
LOC_Os01g45200	Os01g0639200	Molecular Function: 3-beta-hydroxy-delta5-steroid dehydrogenase activity (GO:0003854);	Biological Process: steroid biosynthetic process (GO:0006694);	Biological Process: lignin biosynthetic process (GO:0009809);	Biological Process: defense response to bacterium (GO:0042742);
LOC_Os04g34000	Os04g0416900	Biological Process: response to acid chemical (GO:0001101);	Molecular Function: molecular_function (GO:0003674);	Molecular Function: catalytic activity (GO:0003824);	Cellular Component: cellular_component (GO:0005575);	Cellular Component: intracellular (GO:0005622);	Cellular Component: cell (GO:0005623);	Cellular Component: cytoplasm (GO:0005737);	Cellular Component: mitochondrion (GO:0005739);	Biological Process: organic acid metabolic process (GO:0006082);	Biological Process: lipid metabolic process (GO:0006629);	Biological Process: fatty acid metabolic process (GO:0006631);	Biological Process: fatty acid biosynthetic process (GO:0006633);	Biological Process: membrane lipid metabolic process (GO:0006643);	Biological Process: glycolipid metabolic process (GO:0006664);	Biological Process: cellular aromatic compound metabolic process (GO:0006725);	Biological Process: cell communication (GO:0007154);	Biological Process: signal transduction (GO:0007165);	Biological Process: biological_process (GO:0008150);	Biological Process: metabolic process (GO:0008152);	Molecular Function: UDP-glycosyltransferase activity (GO:0008194);	Molecular Function: galactosyltransferase activity (GO:0008378);	Biological Process: lipid biosynthetic process (GO:0008610);	Biological Process: biosynthetic process (GO:0009058);	Biological Process: glycolipid biosynthetic process (GO:0009247);	Cellular Component: chloroplast (GO:0009507);	Cellular Component: plastid envelope (GO:0009526);	Cellular Component: plastid outer membrane (GO:0009527);	Cellular Component: plastid (GO:0009536);	Biological Process: phenylpropanoid metabolic process (GO:0009698);	Biological Process: phenylpropanoid biosynthetic process (GO:0009699);	Cellular Component: chloroplast outer membrane (GO:0009707);	Biological Process: response to endogenous stimulus (GO:0009719);	Biological Process: response to hormone (GO:0009725);	Biological Process: response to jasmonic acid (GO:0009753);	Biological Process: hormone-mediated signaling pathway (GO:0009755);	Biological Process: lignin metabolic process (GO:0009808);	Biological Process: lignin biosynthetic process (GO:0009809);	Biological Process: jasmonic acid mediated signaling pathway (GO:0009867);	Cellular Component: chloroplast envelope (GO:0009941);	Biological Process: cellular process (GO:0009987);	Biological Process: response to organic substance (GO:0010033);	Biological Process: regulation of photosynthesis (GO:0010109);	Cellular Component: membrane (GO:0016020);	Biological Process: organic acid biosynthetic process (GO:0016053);	Molecular Function: transferase activity (GO:0016740);	Molecular Function: transferase activity, transferring glycosyl groups (GO:0016757);	Molecular Function: transferase activity, transferring hexosyl groups (GO:0016758);	Biological Process: regulation of metabolic process (GO:0019222);
LOC_Os02g09490	Os02g0187800	Molecular Function: zinc ion binding (GO:0008270);	Biological Process: lignin biosynthetic process (GO:0009809);	Molecular Function: cinnamyl-alcohol dehydrogenase activity (GO:0045551);
LOC_Os01g62480	Os01g0842400	Molecular Function: copper ion binding (GO:0005507);	Biological Process: lignin catabolic process (GO:0046274);	Cellular Component: apoplast (GO:0048046);	Molecular Function: hydroquinone:oxygen oxidoreductase activity (GO:0052716);
LOC_Os01g62490	Os01g0842500	Molecular Function: copper ion binding (GO:0005507);	Biological Process: lignin catabolic process (GO:0046274);	Cellular Component: apoplast (GO:0048046);	Molecular Function: hydroquinone:oxygen oxidoreductase activity (GO:0052716);
LOC_Os03g16610	Os03g0273200	Molecular Function: copper ion binding (GO:0005507);	Biological Process: lignin catabolic process (GO:0046274);	Cellular Component: apoplast (GO:0048046);	Molecular Function: hydroquinone:oxygen oxidoreductase activity (GO:0052716);
LOC_Os02g41680	Os02g0627100	Cellular Component: cytoplasm (GO:0005737);	Biological Process: L-phenylalanine catabolic process (GO:0006559);	Biological Process: cinnamic acid biosynthetic process (GO:0009800);	Molecular Function: phenylalanine ammonia-lyase activity (GO:0045548);
LOC_Os12g33610	Os12g0520200	Cellular Component: cytoplasm (GO:0005737);	Biological Process: L-phenylalanine catabolic process (GO:0006559);	Biological Process: cinnamic acid biosynthetic process (GO:0009800);	Molecular Function: phenylalanine ammonia-lyase activity (GO:0045548);
LOC_Os04g43760	Os04g0518100	Cellular Component: cytoplasm (GO:0005737);	Biological Process: L-phenylalanine catabolic process (GO:0006559);	Biological Process: cinnamic acid biosynthetic process (GO:0009800);	Molecular Function: ammonia-lyase activity (GO:0016841);	Molecular Function: phenylalanine ammonia-lyase activity (GO:0045548);
LOC_Os02g41650	Os02g0626400	Cellular Component: cytoplasm (GO:0005737);	Biological Process: L-phenylalanine catabolic process (GO:0006559);	Biological Process: cinnamic acid biosynthetic process (GO:0009800);	Molecular Function: ammonia-lyase activity (GO:0016841);	Molecular Function: phenylalanine ammonia-lyase activity (GO:0045548);
LOC_Os08g34790	Os08g0448000	Molecular Function: catalytic activity (GO:0003824);
LOC_Os02g08100	Os02g0177600	Molecular Function: catalytic activity (GO:0003824);
LOC_Os02g39850	Os02g0611800	Molecular Function: transferase activity, transferring acyl groups other than amino-acyl groups (GO:0016747);
LOC_Os11g42200	Os11g0641500	Molecular Function: copper ion binding (GO:0005507);	Biological Process: lignin catabolic process (GO:0046274);	Cellular Component: apoplast (GO:0048046);	Molecular Function: hydroquinone:oxygen oxidoreductase activity (GO:0052716);
LOC_Os02g51440	Os02g0749700	Molecular Function: copper ion binding (GO:0005507);	Biological Process: lignin catabolic process (GO:0046274);	Cellular Component: apoplast (GO:0048046);	Molecular Function: hydroquinone:oxygen oxidoreductase activity (GO:0052716);
LOC_Os02g26770	Os02g0467000	Molecular Function: iron ion binding (GO:0005506);	Biological Process: lignin metabolic process (GO:0009808);	Cellular Component: membrane (GO:0016020);	Molecular Function: oxidoreductase activity, acting on paired donors, with incorporation or reduction of molecular oxygen, NAD(P)H as one donor, and incorporation of one atom of oxygen (GO:0016709);	Molecular Function: trans-cinnamate 4-monooxygenase activity (GO:0016710);	Molecular Function: heme binding (GO:0020037);
LOC_Os02g41670	Os02g0626600	Cellular Component: cytoplasm (GO:0005737);	Biological Process: L-phenylalanine catabolic process (GO:0006559);	Biological Process: cinnamic acid biosynthetic process (GO:0009800);	Molecular Function: phenylalanine ammonia-lyase activity (GO:0045548);
LOC_Os08g38910	Os08g0498400	Molecular Function: O-methyltransferase activity (GO:0008171);	Molecular Function: S-adenosylmethionine-dependent methyltransferase activity (GO:0008757);	Biological Process: methylation (GO:0032259);
LOC_Os05g50250	Os05g0578500	Molecular Function: 3-beta-hydroxy-delta5-steroid dehydrogenase activity (GO:0003854);	Biological Process: steroid biosynthetic process (GO:0006694);
LOC_Os09g23560	Os09g0400400	Molecular Function: zinc ion binding (GO:0008270);	Molecular Function: oxidoreductase activity (GO:0016491);
LOC_Os08g06100	Os08g0157500	Cellular Component: nucleus (GO:0005634);	Cellular Component: cytoplasm (GO:0005737);	Cellular Component: plasma membrane (GO:0005886);	Cellular Component: plasmodesma (GO:0009506);	Biological Process: lignin biosynthetic process (GO:0009809);	Molecular Function: acetylserotonin O-methyltransferase activity (GO:0017096);	Biological Process: melatonin biosynthetic process (GO:0030187);	Molecular Function: luteolin O-methyltransferase activity (GO:0030744);	Molecular Function: quercetin 3-O-methyltransferase activity (GO:0030755);	Biological Process: methylation (GO:0032259);	Molecular Function: myricetin 3'-O-methyltransferase activity (GO:0033799);	Molecular Function: protein dimerization activity (GO:0046983);	Molecular Function: caffeate O-methyltransferase activity (GO:0047763);	Biological Process: flavonol biosynthetic process (GO:0051555);
LOC_Os01g63180	Os01g0850550	Molecular Function: copper ion binding (GO:0005507);	Biological Process: lignin catabolic process (GO:0046274);	Cellular Component: apoplast (GO:0048046);	Molecular Function: hydroquinone:oxygen oxidoreductase activity (GO:0052716);
LOC_Os02g46970	Os02g0697400	Biological Process: pollen exine formation (GO:0010584);	Molecular Function: 4-coumarate-CoA ligase activity (GO:0016207);
LOC_Os10g29470	Os10g0430200	Molecular Function: zinc ion binding (GO:0008270);	Molecular Function: oxidoreductase activity (GO:0016491);
LOC_Os01g61160	Os01g0827300	Molecular Function: copper ion binding (GO:0005507);	Biological Process: lignin catabolic process (GO:0046274);	Cellular Component: apoplast (GO:0048046);	Molecular Function: hydroquinone:oxygen oxidoreductase activity (GO:0052716);
LOC_Os07g01110	Os07g0101000	Molecular Function: copper ion binding (GO:0005507);	Biological Process: lignin catabolic process (GO:0046274);	Cellular Component: apoplast (GO:0048046);	Molecular Function: hydroquinone:oxygen oxidoreductase activity (GO:0052716);
LOC_Os04g43800	Os04g0518400	Cellular Component: cytoplasm (GO:0005737);	Biological Process: L-phenylalanine catabolic process (GO:0006559);	Biological Process: cinnamic acid biosynthetic process (GO:0009800);	Molecular Function: phenylalanine ammonia-lyase activity (GO:0045548);
LOC_Os05g35290	Os05g0427400	Cellular Component: cytoplasm (GO:0005737);	Biological Process: L-phenylalanine catabolic process (GO:0006559);	Biological Process: cinnamic acid biosynthetic process (GO:0009800);	Molecular Function: phenylalanine ammonia-lyase activity (GO:0045548);
LOC_Os12g15680	Os12g0258700	Molecular Function: copper ion binding (GO:0005507);	Biological Process: lignin catabolic process (GO:0046274);	Cellular Component: apoplast (GO:0048046);	Molecular Function: hydroquinone:oxygen oxidoreductase activity (GO:0052716);
LOC_Os09g23530	Os09g0399800	Molecular Function: zinc ion binding (GO:0008270);	Molecular Function: oxidoreductase activity (GO:0016491);
LOC_Os12g15920	Os12g0259800	Molecular Function: copper ion binding (GO:0005507);	Biological Process: lignin catabolic process (GO:0046274);	Cellular Component: apoplast (GO:0048046);	Molecular Function: hydroquinone:oxygen oxidoreductase activity (GO:0052716);
LOC_Os05g38410	Os05g0458500	Molecular Function: copper ion binding (GO:0005507);	Biological Process: lignin catabolic process (GO:0046274);	Cellular Component: apoplast (GO:0048046);	Molecular Function: hydroquinone:oxygen oxidoreductase activity (GO:0052716);
LOC_Os05g38420	Os05g0458600	Molecular Function: copper ion binding (GO:0005507);	Biological Process: lignin catabolic process (GO:0046274);	Cellular Component: apoplast (GO:0048046);	Molecular Function: hydroquinone:oxygen oxidoreductase activity (GO:0052716);
LOC_Os02g56700	Os02g0811800	Biological Process: lignin biosynthetic process (GO:0009809);	Molecular Function: oxidoreductase activity (GO:0016491);	Molecular Function: oxidoreductase activity, acting on the CH-OH group of donors, NAD or NADP as acceptor (GO:0016616);
LOC_Os01g27700	Os01g0374600	Molecular Function: copper ion binding (GO:0005507);	Biological Process: lignin catabolic process (GO:0046274);	Cellular Component: apoplast (GO:0048046);	Molecular Function: hydroquinone:oxygen oxidoreductase activity (GO:0052716);
LOC_Os11g01730	Os11g0108700	Molecular Function: copper ion binding (GO:0005507);	Biological Process: lignin catabolic process (GO:0046274);	Cellular Component: apoplast (GO:0048046);	Molecular Function: hydroquinone:oxygen oxidoreductase activity (GO:0052716);
LOC_Os05g38390	Os05g0458300	Molecular Function: copper ion binding (GO:0005507);	Biological Process: lignin catabolic process (GO:0046274);	Cellular Component: apoplast (GO:0048046);	Molecular Function: hydroquinone:oxygen oxidoreductase activity (GO:0052716);
LOC_Os08g14760	Os08g0245200	Molecular Function: catalytic activity (GO:0003824);
LOC_Os04g15920	Os04g0229100	Molecular Function: zinc ion binding (GO:0008270);	Molecular Function: oxidoreductase activity (GO:0016491);
LOC_Os07g36630	Os07g0551700	Cellular Component: integral component of membrane (GO:0016021);	Molecular Function: cellulose synthase (UDP-forming) activity (GO:0016760);	Biological Process: cellulose biosynthetic process (GO:0030244);	Biological Process: cell wall organization (GO:0071555);
LOC_Os06g14540	Os06g0256900	Molecular Function: cellulase activity (GO:0008810);	Biological Process: cellulose catabolic process (GO:0030245);
LOC_Os09g36060	Os09g0530200	Molecular Function: cellulase activity (GO:0008810);	Biological Process: cellulose catabolic process (GO:0030245);
LOC_Os02g50040	Os02g0733300	Molecular Function: cellulase activity (GO:0008810);	Biological Process: cellulose catabolic process (GO:0030245);
LOC_Os05g32500	Os05g0391200	Biological Process: polysaccharide biosynthetic process (GO:0000271);	Molecular Function: molecular_function (GO:0003674);	Molecular Function: binding (GO:0005488);	Molecular Function: protein binding (GO:0005515);	Cellular Component: cellular_component (GO:0005575);	Cellular Component: cell wall (GO:0005618);	Cellular Component: intracellular (GO:0005622);	Cellular Component: cell (GO:0005623);	Cellular Component: cytoplasm (GO:0005737);	Cellular Component: endosome (GO:0005768);	Cellular Component: Golgi apparatus (GO:0005794);	Cellular Component: trans-Golgi network (GO:0005802);	Biological Process: carbohydrate metabolic process (GO:0005975);	Biological Process: polysaccharide metabolic process (GO:0005976);	Biological Process: cellular glucan metabolic process (GO:0006073);	Biological Process: regulation of carbohydrate metabolic process (GO:0006109);	Biological Process: biological_process (GO:0008150);	Biological Process: metabolic process (GO:0008152);	Biological Process: biosynthetic process (GO:0009058);	Biological Process: macromolecule biosynthetic process (GO:0009059);	Biological Process: glucan biosynthetic process (GO:0009250);	Biological Process: plant-type cell wall organization (GO:0009664);	Biological Process: plant-type cell wall biogenesis (GO:0009832);	Biological Process: regulation of biosynthetic process (GO:0009889);	Biological Process: cellular process (GO:0009987);	Biological Process: cell wall polysaccharide metabolic process (GO:0010383);	Biological Process: regulation of macromolecule biosynthetic process (GO:0010556);	Biological Process: regulation of cellular carbohydrate metabolic process (GO:0010675);	Biological Process: regulation of glucan biosynthetic process (GO:0010962);	Biological Process: regulation of cell wall macromolecule metabolic process (GO:0010981);	Cellular Component: endomembrane system (GO:0012505);	Biological Process: cellular component organization (GO:0016043);	Biological Process: carbohydrate biosynthetic process (GO:0016051);	Biological Process: regulation of metabolic process (GO:0019222);	Biological Process: cellulose metabolic process (GO:0030243);	Biological Process: cellulose biosynthetic process (GO:0030244);	Cellular Component: external encapsulating structure (GO:0030312);	Biological Process: regulation of cellular metabolic process (GO:0031323);	Biological Process: regulation of cellular biosynthetic process (GO:0031326);	Cellular Component: cytoplasmic vesicle (GO:0031410);	Cellular Component: vesicle (GO:0031982);	Cellular Component: organelle subcompartment (GO:0031984);	Biological Process: regulation of polysaccharide metabolic process (GO:0032881);	Biological Process: regulation of polysaccharide biosynthetic process (GO:0032885);	Biological Process: regulation of beta-glucan metabolic process (GO:0032950);	Biological Process: regulation of beta-glucan biosynthetic process (GO:0032951);	Biological Process: cellular polysaccharide biosynthetic process (GO:0033692);	Biological Process: cellular carbohydrate biosynthetic process (GO:0034637);
LOC_Os07g10770	Os07g0208500	Cellular Component: plasma membrane (GO:0005886);	Cellular Component: integral component of membrane (GO:0016021);	Molecular Function: cellulose synthase (UDP-forming) activity (GO:0016760);	Biological Process: cellulose biosynthetic process (GO:0030244);	Molecular Function: metal ion binding (GO:0046872);	Biological Process: cell wall organization (GO:0071555);
LOC_Os07g24190	Os07g0424400	Cellular Component: plasma membrane (GO:0005886);	Cellular Component: integral component of membrane (GO:0016021);	Molecular Function: cellulose synthase (UDP-forming) activity (GO:0016760);	Biological Process: cellulose biosynthetic process (GO:0030244);	Molecular Function: metal ion binding (GO:0046872);	Biological Process: cell wall organization (GO:0071555);
LOC_Os09g30130	Os09g0478300	Cellular Component: integral component of membrane (GO:0016021);	Molecular Function: cellulose synthase (UDP-forming) activity (GO:0016760);	Biological Process: cellulose biosynthetic process (GO:0030244);	Biological Process: cell wall organization (GO:0071555);
LOC_Os05g08370	Os05g0176100	Cellular Component: plasma membrane (GO:0005886);	Cellular Component: integral component of membrane (GO:0016021);	Molecular Function: cellulose synthase (UDP-forming) activity (GO:0016760);	Biological Process: cellulose biosynthetic process (GO:0030244);	Molecular Function: metal ion binding (GO:0046872);	Biological Process: cell wall organization (GO:0071555);
LOC_Os03g62090	Os03g0837100	Cellular Component: plasma membrane (GO:0005886);	Cellular Component: integral component of membrane (GO:0016021);	Molecular Function: cellulose synthase (UDP-forming) activity (GO:0016760);	Biological Process: cellulose biosynthetic process (GO:0030244);	Molecular Function: metal ion binding (GO:0046872);	Biological Process: cell wall organization (GO:0071555);
LOC_Os07g14850	Os07g0252400	Cellular Component: plasma membrane (GO:0005886);	Cellular Component: integral component of membrane (GO:0016021);	Molecular Function: cellulose synthase (UDP-forming) activity (GO:0016760);	Biological Process: cellulose biosynthetic process (GO:0030244);	Molecular Function: metal ion binding (GO:0046872);	Biological Process: cell wall organization (GO:0071555);
LOC_Os06g02180	Os06g0111800	Cellular Component: integral component of membrane (GO:0016021);	Molecular Function: cellulose synthase (UDP-forming) activity (GO:0016760);	Biological Process: cellulose biosynthetic process (GO:0030244);	Biological Process: cell wall organization (GO:0071555);
LOC_Os03g52630	Os03g0736300	Molecular Function: cellulase activity (GO:0008810);	Cellular Component: integral component of membrane (GO:0016021);	Biological Process: cellulose catabolic process (GO:0030245);
LOC_Os06g13830	Os06g0247900	Molecular Function: cellulase activity (GO:0008810);	Biological Process: cellulose catabolic process (GO:0030245);
LOC_Os09g36350	Os09g0533900	Molecular Function: cellulase activity (GO:0008810);	Cellular Component: integral component of membrane (GO:0016021);	Biological Process: lipid storage (GO:0019915);	Biological Process: cellulose catabolic process (GO:0030245);
LOC_Os03g21210	Os03g0329500	Molecular Function: cellulase activity (GO:0008810);	Cellular Component: integral component of membrane (GO:0016021);	Biological Process: cellulose catabolic process (GO:0030245);
LOC_Os02g50490	Os02g0738600	Molecular Function: cellulase activity (GO:0008810);	Cellular Component: integral component of membrane (GO:0016021);	Biological Process: cellulose catabolic process (GO:0030245);
LOC_Os01g67220	Os01g0897600	Molecular Function: beta-glucosidase activity (GO:0008422);	Biological Process: cellulose catabolic process (GO:0030245);	Molecular Function: scopolin beta-glucosidase activity (GO:0102483);
LOC_Os02g05744	Os02g0151300	Molecular Function: cellulase activity (GO:0008810);	Biological Process: cellulose catabolic process (GO:0030245);
LOC_Os09g23084	Os09g0394300	Molecular Function: cellulase activity (GO:0008810);	Biological Process: cellulose catabolic process (GO:0030245);
LOC_Os06g11990	Os06g0223800	Biological Process: reproduction (GO:0000003);	Biological Process: microtubule cytoskeleton organization (GO:0000226);	Biological Process: polysaccharide biosynthetic process (GO:0000271);	Biological Process: mitotic cell cycle (GO:0000278);	Biological Process: mitotic cytokinesis (GO:0000281);	Biological Process: cytokinesis (GO:0000910);	Biological Process: response to acid chemical (GO:0001101);	Biological Process: regulation of immune system process (GO:0002682);	Biological Process: negative regulation of immune system process (GO:0002683);	Biological Process: developmental process involved in reproduction (GO:0003006);	Molecular Function: molecular_function (GO:0003674);	Molecular Function: catalytic activity (GO:0003824);	Molecular Function: ubiquitin-protein transferase activity (GO:0004842);	Molecular Function: receptor binding (GO:0005102);	Molecular Function: binding (GO:0005488);	Molecular Function: protein binding (GO:0005515);	Cellular Component: cellular_component (GO:0005575);	Cellular Component: intracellular (GO:0005622);	Cellular Component: cell (GO:0005623);	Cellular Component: nucleus (GO:0005634);	Cellular Component: cytoplasm (GO:0005737);	Cellular Component: Golgi apparatus (GO:0005794);	Cellular Component: cytosol (GO:0005829);	Cellular Component: cytoskeleton (GO:0005856);	Cellular Component: microtubule (GO:0005874);	Cellular Component: cytoplasmic microtubule (GO:0005881);	Cellular Component: plasma membrane (GO:0005886);	Cellular Component: cell-cell junction (GO:0005911);	Cellular Component: cell cortex (GO:0005938);	Biological Process: carbohydrate metabolic process (GO:0005975);	Biological Process: polysaccharide metabolic process (GO:0005976);	Biological Process: cellular glucan metabolic process (GO:0006073);	Biological Process: cellular protein modification process (GO:0006464);	Biological Process: nitrogen compound metabolic process (GO:0006807);	Biological Process: response to stress (GO:0006950);	Biological Process: defense response (GO:0006952);	Biological Process: organelle organization (GO:0006996);	Biological Process: cytoskeleton organization (GO:0007010);	Biological Process: microtubule-based process (GO:0007017);	Biological Process: cell cycle (GO:0007049);	Biological Process: multicellular organism development (GO:0007275);	Molecular Function: microtubule binding (GO:0008017);	Molecular Function: cytoskeletal protein binding (GO:0008092);	Biological Process: protein localization (GO:0008104);	Biological Process: biological_process (GO:0008150);	Biological Process: metabolic process (GO:0008152);	Biological Process: biosynthetic process (GO:0009058);	Biological Process: macromolecule biosynthetic process (GO:0009059);
LOC_Os03g54750	Os03g0754500	Biological Process: cellulose microfibril organization (GO:0010215);	Cellular Component: anchored component of membrane (GO:0031225);
LOC_Os03g63060	Os03g0847900	Biological Process: reproduction (GO:0000003);	Biological Process: cell morphogenesis (GO:0000902);	Biological Process: cell morphogenesis involved in differentiation (GO:0000904);	Biological Process: developmental process involved in reproduction (GO:0003006);	Cellular Component: cellular_component (GO:0005575);	Cellular Component: cell (GO:0005623);	Cellular Component: plasma membrane (GO:0005886);	Biological Process: regulation of actin polymerization or depolymerization (GO:0008064);	Biological Process: biological_process (GO:0008150);	Biological Process: anatomical structure morphogenesis (GO:0009653);	Biological Process: plant-type cell wall organization (GO:0009664);	Biological Process: unidimensional cell growth (GO:0009826);	Biological Process: plant-type cell wall biogenesis (GO:0009832);	Biological Process: pollination (GO:0009856);	Biological Process: pollen tube growth (GO:0009860);	Biological Process: cell tip growth (GO:0009932);	Biological Process: cellular process (GO:0009987);	Biological Process: cellulose microfibril organization (GO:0010215);	Cellular Component: membrane (GO:0016020);	Biological Process: cellular component organization (GO:0016043);	Biological Process: cell growth (GO:0016049);	Cellular Component: apical plasma membrane (GO:0016324);	Biological Process: regulation of exocytosis (GO:0017157);	Biological Process: reproductive process (GO:0022414);	Biological Process: cellular component assembly (GO:0022607);	Biological Process: cell differentiation (GO:0030154);	Biological Process: extracellular matrix organization (GO:0030198);	Biological Process: regulation of actin filament length (GO:0030832);	Biological Process: regulation of actin filament polymerization (GO:0030833);	Biological Process: regulation of protein polymerization (GO:0032271);	Biological Process: multicellular organismal process (GO:0032501);	Biological Process: developmental process (GO:0032502);	Biological Process: regulation of cellular component size (GO:0032535);	Biological Process: regulation of localization (GO:0032879);	Biological Process: regulation of actin cytoskeleton organization (GO:0032956);	Biological Process: regulation of actin filament-based process (GO:0032970);	Biological Process: cellular component morphogenesis (GO:0032989);	Biological Process: regulation of organelle organization (GO:0033043);	Biological Process: growth (GO:0040007);	Biological Process: cell wall biogenesis (GO:0042546);	Biological Process: extracellular structure organization (GO:0043062);	Biological Process: regulation of protein complex assembly (GO:0043254);	Biological Process: cellular component biogenesis (GO:0044085);	Biological Process: regulation of cellular component biogenesis (GO:0044087);	Cellular Component: membrane part (GO:0044425);	Cellular Component: plasma membrane part (GO:0044459);	Cellular Component: cell part (GO:0044464);	Biological Process: multi-multicellular organism process (GO:0044706);
LOC_Os10g35460	Os10g0497700	Biological Process: cellulose microfibril organization (GO:0010215);	Cellular Component: anchored component of membrane (GO:0031225);
LOC_Os05g32110	Os05g0386800	Biological Process: cellulose microfibril organization (GO:0010215);	Cellular Component: anchored component of membrane (GO:0031225);
LOC_Os07g41320	Os07g0604400	Biological Process: cellulose microfibril organization (GO:0010215);	Cellular Component: integral component of membrane (GO:0016021);	Cellular Component: anchored component of membrane (GO:0031225);
LOC_Os05g02500	Os05g0115800	Molecular Function: protein tyrosine phosphatase activity (GO:0004725);	Molecular Function: protein tyrosine/serine/threonine phosphatase activity (GO:0008138);	Molecular Function: kinase activity (GO:0016301);
LOC_Os05g43530	Os05g0510800	Cellular Component: integral component of membrane (GO:0016021);
LOC_Os08g33740	Os08g0434632	Cellular Component: integral component of membrane (GO:0016021);
LOC_Os06g12460	Os06g0230100	Cellular Component: integral component of membrane (GO:0016021);
LOC_Os02g51060	Os02g0744650	Cellular Component: integral component of membrane (GO:0016021);
LOC_Os05g12150	Os05g0212300	Molecular Function: cellulase activity (GO:0008810);	Biological Process: cellulose catabolic process (GO:0030245);	Molecular Function: carbohydrate binding (GO:0030246);
LOC_Os05g03840	Os05g0129200	Molecular Function: cellulase activity (GO:0008810);	Biological Process: cellulose catabolic process (GO:0030245);
LOC_Os07g36610	Os07g0551600	Cellular Component: integral component of membrane (GO:0016021);	Molecular Function: cellulose synthase (UDP-forming) activity (GO:0016760);	Biological Process: cellulose biosynthetic process (GO:0030244);	Biological Process: cell wall organization (GO:0071555);
LOC_Os10g20260	Os10g0343400	Cellular Component: integral component of membrane (GO:0016021);	Molecular Function: cellulose synthase (UDP-forming) activity (GO:0016760);	Biological Process: cellulose biosynthetic process (GO:0030244);	Biological Process: cell wall organization (GO:0071555);
LOC_Os08g06380	Os08g0160500	Cellular Component: integral component of membrane (GO:0016021);	Molecular Function: cellulose synthase (UDP-forming) activity (GO:0016760);	Biological Process: cellulose biosynthetic process (GO:0030244);	Biological Process: cell wall organization (GO:0071555);
LOC_Os10g32980	Os10g0467800	Cellular Component: plasma membrane (GO:0005886);	Biological Process: plant-type secondary cell wall biogenesis (GO:0009834);	Cellular Component: integral component of membrane (GO:0016021);	Molecular Function: cellulose synthase (UDP-forming) activity (GO:0016760);	Biological Process: cellulose biosynthetic process (GO:0030244);	Molecular Function: metal ion binding (GO:0046872);	Biological Process: cell wall organization (GO:0071555);
LOC_Os01g54620	Os01g0750300	Biological Process: plant-type secondary cell wall biogenesis (GO:0009834);	Cellular Component: integral component of membrane (GO:0016021);	Molecular Function: cellulose synthase (UDP-forming) activity (GO:0016760);	Biological Process: cellulose biosynthetic process (GO:0030244);	Biological Process: cell wall organization (GO:0071555);
LOC_Os09g25490	Os09g0422500	Cellular Component: plasma membrane (GO:0005886);	Biological Process: plant-type secondary cell wall biogenesis (GO:0009834);	Cellular Component: integral component of membrane (GO:0016021);	Molecular Function: cellulose synthase (UDP-forming) activity (GO:0016760);	Biological Process: cellulose biosynthetic process (GO:0030244);	Molecular Function: metal ion binding (GO:0046872);	Biological Process: cell wall organization (GO:0071555);
LOC_Os07g49080	Os07g0690900	Biological Process: cellulose microfibril organization (GO:0010215);	Cellular Component: integral component of membrane (GO:0016021);	Cellular Component: anchored component of membrane (GO:0031225);
LOC_Os03g18910	Os03g0301200	Biological Process: cellulose microfibril organization (GO:0010215);	Cellular Component: integral component of membrane (GO:0016021);	Cellular Component: anchored component of membrane (GO:0031225);
LOC_Os09g30120	Os09g0478100	Cellular Component: integral component of membrane (GO:0016021);	Molecular Function: cellulose synthase (UDP-forming) activity (GO:0016760);	Biological Process: cellulose biosynthetic process (GO:0030244);	Biological Process: cell wall organization (GO:0071555);
LOC_Os12g36890	Os12g0555600	Cellular Component: Golgi apparatus (GO:0005794);	Cellular Component: integral component of membrane (GO:0016021);	Molecular Function: cellulose synthase (UDP-forming) activity (GO:0016760);	Biological Process: cellulose biosynthetic process (GO:0030244);	Biological Process: cell wall organization (GO:0071555);	Biological Process: plant-type cell wall organization or biogenesis (GO:0071669);
LOC_Os02g03120	Os02g0123700	Molecular Function: cellulase activity (GO:0008810);	Biological Process: cellulose catabolic process (GO:0030245);
LOC_Os11g34460	Os11g0547000	Biological Process: regulation of transcription, DNA-templated (GO:0006355);	Biological Process: circadian rhythm (GO:0007623);	Biological Process: response to blue light (GO:0009637);	Biological Process: positive regulation of flower development (GO:0009911);	Biological Process: negative regulation of cellulose biosynthetic process (GO:2001007);
LOC_Os04g41970	Os04g0497200	Molecular Function: cellulase activity (GO:0008810);	Cellular Component: integral component of membrane (GO:0016021);	Biological Process: cellulose catabolic process (GO:0030245);
LOC_Os07g41310	Os07g0604300	Biological Process: cellulose microfibril organization (GO:0010215);	Cellular Component: integral component of membrane (GO:0016021);	Cellular Component: anchored component of membrane (GO:0031225);
LOC_Os02g09930	Os02g0192500	Cellular Component: integral component of membrane (GO:0016021);
LOC_Os08g25710	Os08g0345500	Cellular Component: integral component of membrane (GO:0016021);	Molecular Function: cellulose synthase (UDP-forming) activity (GO:0016760);	Biological Process: cellulose biosynthetic process (GO:0030244);	Biological Process: cell wall organization (GO:0071555);
LOC_Os01g21070	Os01g0312800	Molecular Function: cellulase activity (GO:0008810);	Biological Process: cellulose catabolic process (GO:0030245);
LOC_Os04g35030	Os04g0429600	Cellular Component: integral component of membrane (GO:0016021);	Molecular Function: cellulose synthase (UDP-forming) activity (GO:0016760);	Biological Process: cellulose biosynthetic process (GO:0030244);	Biological Process: cell wall organization (GO:0071555);
LOC_Os12g29300	Os12g0477200	Cellular Component: integral component of membrane (GO:0016021);	Molecular Function: cellulose synthase (UDP-forming) activity (GO:0016760);	Biological Process: cellulose biosynthetic process (GO:0030244);	Biological Process: cell wall organization (GO:0071555);
LOC_Os06g22980	Os06g0336500	Cellular Component: integral component of membrane (GO:0016021);	Molecular Function: cellulose synthase (UDP-forming) activity (GO:0016760);	Biological Process: cellulose biosynthetic process (GO:0030244);	Biological Process: cell wall organization (GO:0071555);
LOC_Os01g12070	Os01g0220100	Molecular Function: cellulase activity (GO:0008810);	Biological Process: cellulose catabolic process (GO:0030245);	Molecular Function: carbohydrate binding (GO:0030246);
LOC_Os08g15420	Os08g0253800	Cellular Component: integral component of membrane (GO:0016021);
LOC_Os09g30105	Os09g0478000	Cellular Component: integral component of membrane (GO:0016021);	Molecular Function: cellulose synthase (UDP-forming) activity (GO:0016760);	Biological Process: cellulose biosynthetic process (GO:0030244);	Biological Process: cell wall organization (GO:0071555);
LOC_Os08g29770	Os08g0387400	Molecular Function: cellulase activity (GO:0008810);	Biological Process: cellulose catabolic process (GO:0030245);
LOC_Os12g24040	Os12g0428200	Biological Process: autophagy (GO:0006914);	Molecular Function: cellulase activity (GO:0008810);	Biological Process: cellulose catabolic process (GO:0030245);
LOC_Os03g30250	Os03g0416350	Biological Process: cellulose microfibril organization (GO:0010215);	Cellular Component: anchored component of membrane (GO:0031225);
LOC_Os10g40770	unknown	unknown
LOC_Os05g41150	Os05g0490400	Cellular Component: integral component of membrane (GO:0016021);
LOC_Os03g07350	Os03g0169500	Cellular Component: integral component of membrane (GO:0016021);
LOC_Os02g52610	Os02g0763900	Molecular Function: DNA binding (GO:0003677);	Cellular Component: nucleus (GO:0005634);	Molecular Function: galactoside 2-alpha-L-fucosyltransferase activity (GO:0008107);	Cellular Component: membrane (GO:0016020);	Biological Process: cell wall biogenesis (GO:0042546);
LOC_Os07g09690	Os07g0195200	Cellular Component: Golgi apparatus (GO:0005794);	Biological Process: protein glycosylation (GO:0006486);	Cellular Component: integral component of membrane (GO:0016021);	Molecular Function: transferase activity, transferring glycosyl groups (GO:0016757);	Molecular Function: carbohydrate binding (GO:0030246);
LOC_Os01g65780	Os01g0880200	Cellular Component: integral component of membrane (GO:0016021);	Molecular Function: transferase activity, transferring glycosyl groups (GO:0016757);
LOC_Os02g52640	Os02g0764400	Molecular Function: galactoside 2-alpha-L-fucosyltransferase activity (GO:0008107);	Cellular Component: integral component of membrane (GO:0016021);	Cellular Component: Golgi cisterna membrane (GO:0032580);	Biological Process: cell wall biogenesis (GO:0042546);	Biological Process: cell wall organization (GO:0071555);
LOC_Os03g58900	Os03g0803600	Cellular Component: Golgi apparatus (GO:0005794);	Biological Process: protein glycosylation (GO:0006486);	Cellular Component: integral component of membrane (GO:0016021);	Molecular Function: transferase activity, transferring glycosyl groups (GO:0016757);	Molecular Function: carbohydrate binding (GO:0030246);
LOC_Os02g35020	Os02g0556000	Molecular Function: transferase activity, transferring glycosyl groups (GO:0016757);
LOC_Os08g24750	Os08g0334900	Cellular Component: Golgi apparatus (GO:0005794);	Molecular Function: galactoside 2-alpha-L-fucosyltransferase activity (GO:0008107);	Biological Process: xyloglucan biosynthetic process (GO:0009969);	Cellular Component: integral component of membrane (GO:0016021);	Cellular Component: Golgi cisterna membrane (GO:0032580);	Biological Process: cell wall organization (GO:0071555);
LOC_Os02g17534	Os02g0275200	Cellular Component: Golgi apparatus (GO:0005794);	Molecular Function: galactoside 2-alpha-L-fucosyltransferase activity (GO:0008107);	Biological Process: xyloglucan biosynthetic process (GO:0009969);	Cellular Component: Golgi cisterna membrane (GO:0032580);	Biological Process: cell wall organization (GO:0071555);
LOC_Os07g09670	Os07g0194800	Cellular Component: Golgi apparatus (GO:0005794);	Biological Process: protein glycosylation (GO:0006486);	Cellular Component: integral component of membrane (GO:0016021);	Molecular Function: transferase activity, transferring glycosyl groups (GO:0016757);	Molecular Function: carbohydrate binding (GO:0030246);
LOC_Os02g25630	Os02g0453400	Molecular Function: galactoside 2-alpha-L-fucosyltransferase activity (GO:0008107);	Cellular Component: Golgi cisterna membrane (GO:0032580);	Biological Process: cell wall biogenesis (GO:0042546);	Biological Process: cell wall organization (GO:0071555);
LOC_Os06g10920	Os06g0211700	Molecular Function: galactoside 2-alpha-L-fucosyltransferase activity (GO:0008107);	Cellular Component: integral component of membrane (GO:0016021);	Cellular Component: Golgi cisterna membrane (GO:0032580);	Biological Process: cell wall biogenesis (GO:0042546);	Biological Process: cell wall organization (GO:0071555);
LOC_Os02g17600	unknown	Molecular Function: galactoside 2-alpha-L-fucosyltransferase activity (GO:0008107);	Cellular Component: Golgi cisterna membrane (GO:0032580);	Biological Process: cell wall biogenesis (GO:0042546);	Biological Process: cell wall organization (GO:0071555);
LOC_Os02g52590	Os02g0763800	Molecular Function: galactoside 2-alpha-L-fucosyltransferase activity (GO:0008107);	Cellular Component: Golgi cisterna membrane (GO:0032580);	Biological Process: cell wall biogenesis (GO:0042546);	Biological Process: cell wall organization (GO:0071555);
LOC_Os06g10910	Os06g0211600	Molecular Function: galactoside 2-alpha-L-fucosyltransferase activity (GO:0008107);	Cellular Component: integral component of membrane (GO:0016021);	Cellular Component: Golgi cisterna membrane (GO:0032580);	Biological Process: cell wall biogenesis (GO:0042546);	Biological Process: cell wall organization (GO:0071555);
LOC_Os01g21034	Os01g0312500	Molecular Function: pectinesterase activity (GO:0030599);	Molecular Function: pectinesterase inhibitor activity (GO:0046910);
LOC_Os10g40290	Os10g0550500	Cellular Component: extracellular region (GO:0005576);	Cellular Component: cell wall (GO:0005618);	Cellular Component: integral component of membrane (GO:0016021);	Molecular Function: hydrolase activity (GO:0016787);	Biological Process: cell wall organization (GO:0071555);
LOC_Os12g28015	Os12g0466200	Molecular Function: pectinesterase activity (GO:0030599);	Biological Process: cell wall modification (GO:0042545);	Molecular Function: aspartyl esterase activity (GO:0045330);
LOC_Os08g10604	Os08g0206950	Molecular Function: pectinesterase activity (GO:0030599);	Biological Process: cell wall modification (GO:0042545);	Molecular Function: aspartyl esterase activity (GO:0045330);	Biological Process: pectin catabolic process (GO:0045490);
LOC_Os01g65790	Os01g0880300	Cellular Component: extracellular region (GO:0005576);	Cellular Component: cell wall (GO:0005618);	Molecular Function: pectinesterase activity (GO:0030599);	Biological Process: cell wall modification (GO:0042545);	Molecular Function: aspartyl esterase activity (GO:0045330);	Biological Process: pectin catabolic process (GO:0045490);
LOC_Os08g34910	Os08g0450200	Molecular Function: enzyme inhibitor activity (GO:0004857);	Cellular Component: integral component of membrane (GO:0016021);	Molecular Function: pectinesterase activity (GO:0030599);	Biological Process: cell wall modification (GO:0042545);	Molecular Function: aspartyl esterase activity (GO:0045330);	Biological Process: pectin catabolic process (GO:0045490);
LOC_Os07g47830	Os07g0675100	Molecular Function: enzyme inhibitor activity (GO:0004857);	Molecular Function: pectinesterase activity (GO:0030599);	Biological Process: cell wall modification (GO:0042545);	Molecular Function: aspartyl esterase activity (GO:0045330);	Biological Process: pectin catabolic process (GO:0045490);
LOC_Os04g46740	Os04g0553650	Molecular Function: pectinesterase activity (GO:0030599);	Biological Process: cell wall modification (GO:0042545);	Molecular Function: aspartyl esterase activity (GO:0045330);	Biological Process: pectin catabolic process (GO:0045490);
LOC_Os07g44070	Os07g0634600	Cellular Component: extracellular region (GO:0005576);	Cellular Component: plant-type cell wall (GO:0009505);	Molecular Function: carboxylic ester hydrolase activity (GO:0052689);	Molecular Function: pectin acetylesterase activity (GO:0052793);	Biological Process: cell wall organization (GO:0071555);
LOC_Os01g66830	unknown	Cellular Component: extracellular region (GO:0005576);	Cellular Component: cell wall (GO:0005618);	Molecular Function: hydrolase activity (GO:0016787);	Biological Process: cell wall organization (GO:0071555);
LOC_Os02g51860	Os02g0755000	Molecular Function: methyltransferase activity (GO:0008168);	Cellular Component: integral component of membrane (GO:0016021);	Biological Process: methylation (GO:0032259);
LOC_Os06g43160	Os06g0638300	Biological Process: protein glycosylation (GO:0006486);	Molecular Function: transferase activity, transferring glycosyl groups (GO:0016757);
LOC_Os01g43160	Os01g0618900	Molecular Function: polygalacturonase activity (GO:0004650);	Cellular Component: extracellular region (GO:0005576);	Biological Process: carbohydrate metabolic process (GO:0005975);	Biological Process: cell wall organization (GO:0071555);
LOC_Os04g54360	Os04g0636100	Cellular Component: Golgi cis cisterna (GO:0000137);	Cellular Component: Golgi membrane (GO:0000139);	Cellular Component: endosome (GO:0005768);	Cellular Component: trans-Golgi network (GO:0005802);	Cellular Component: integral component of membrane (GO:0016021);	Molecular Function: polygalacturonate 4-alpha-galacturonosyltransferase activity (GO:0047262);	Biological Process: mucilage pectin biosynthetic process (GO:0048358);	Biological Process: cell wall organization (GO:0071555);
LOC_Os06g12280	Os06g0227300	Cellular Component: Golgi membrane (GO:0000139);	Biological Process: pectin biosynthetic process (GO:0045489);	Molecular Function: polygalacturonate 4-alpha-galacturonosyltransferase activity (GO:0047262);	Biological Process: cell wall organization (GO:0071555);
LOC_Os12g02910	Os12g0122400	Cellular Component: Golgi membrane (GO:0000139);	Cellular Component: integral component of membrane (GO:0016021);	Biological Process: pectin biosynthetic process (GO:0045489);	Molecular Function: polygalacturonate 4-alpha-galacturonosyltransferase activity (GO:0047262);	Biological Process: cell wall organization (GO:0071555);
LOC_Os03g21250	Os03g0330000	Cellular Component: Golgi membrane (GO:0000139);	Biological Process: pectin biosynthetic process (GO:0045489);	Molecular Function: polygalacturonate 4-alpha-galacturonosyltransferase activity (GO:0047262);	Biological Process: cell wall organization (GO:0071555);
LOC_Os07g48370	Os07g0681700	Cellular Component: Golgi membrane (GO:0000139);	Biological Process: pectin biosynthetic process (GO:0045489);	Molecular Function: polygalacturonate 4-alpha-galacturonosyltransferase activity (GO:0047262);	Biological Process: cell wall organization (GO:0071555);
LOC_Os04g05050	Os04g0137201	Molecular Function: pectate lyase activity (GO:0030570);	Biological Process: pectin catabolic process (GO:0045490);	Molecular Function: metal ion binding (GO:0046872);
LOC_Os11g05494	Os11g0153100	Molecular Function: pectinesterase activity (GO:0030599);	Biological Process: cell wall modification (GO:0042545);	Molecular Function: aspartyl esterase activity (GO:0045330);
LOC_Os09g39760	Os09g0571100	Cellular Component: integral component of membrane (GO:0016021);	Molecular Function: pectinesterase activity (GO:0030599);	Biological Process: cell wall modification (GO:0042545);	Molecular Function: aspartyl esterase activity (GO:0045330);	Biological Process: pectin catabolic process (GO:0045490);	Molecular Function: carboxylic ester hydrolase activity (GO:0052689);
LOC_Os01g21630	Os01g0319000	Cellular Component: extracellular region (GO:0005576);	Cellular Component: cell wall (GO:0005618);	Molecular Function: hydrolase activity (GO:0016787);	Biological Process: cell wall organization (GO:0071555);
LOC_Os08g01670	Os08g0108100	Molecular Function: pectinesterase inhibitor activity (GO:0046910);
LOC_Os07g41650	Os07g0607400	Molecular Function: pectinesterase activity (GO:0030599);	Biological Process: cell wall modification (GO:0042545);	Molecular Function: aspartyl esterase activity (GO:0045330);	Biological Process: pectin catabolic process (GO:0045490);
LOC_Os01g20980	Os01g0311800	Molecular Function: pectinesterase activity (GO:0030599);	Biological Process: cell wall modification (GO:0042545);	Molecular Function: aspartyl esterase activity (GO:0045330);	Biological Process: pectin catabolic process (GO:0045490);	Molecular Function: pectinesterase inhibitor activity (GO:0046910);
LOC_Os08g34900	Os08g0450100	Cellular Component: extracellular region (GO:0005576);	Cellular Component: cell wall (GO:0005618);	Molecular Function: pectinesterase activity (GO:0030599);	Biological Process: cell wall modification (GO:0042545);	Molecular Function: aspartyl esterase activity (GO:0045330);	Biological Process: pectin catabolic process (GO:0045490);	Molecular Function: pectinesterase inhibitor activity (GO:0046910);
LOC_Os11g37980	Os11g0592300	Cellular Component: Golgi membrane (GO:0000139);	Cellular Component: integral component of membrane (GO:0016021);	Biological Process: pectin biosynthetic process (GO:0045489);	Molecular Function: polygalacturonate 4-alpha-galacturonosyltransferase activity (GO:0047262);	Biological Process: cell wall organization (GO:0071555);
LOC_Os01g57854	Os01g0788400	Cellular Component: extracellular region (GO:0005576);	Cellular Component: cell wall (GO:0005618);	Cellular Component: integral component of membrane (GO:0016021);	Molecular Function: pectinesterase activity (GO:0030599);	Biological Process: cell wall modification (GO:0042545);	Molecular Function: aspartyl esterase activity (GO:0045330);	Biological Process: pectin catabolic process (GO:0045490);	Molecular Function: pectinesterase inhibitor activity (GO:0046910);
LOC_Os05g44600	Os05g0521600	Molecular Function: pectinesterase activity (GO:0030599);	Biological Process: cell wall modification (GO:0042545);	Molecular Function: aspartyl esterase activity (GO:0045330);	Biological Process: pectin catabolic process (GO:0045490);
LOC_Os03g61510	Os03g0830600	Molecular Function: enzyme inhibitor activity (GO:0004857);
LOC_Os03g61530	Os03g0830800	Molecular Function: enzyme inhibitor activity (GO:0004857);
LOC_Os05g46510	Os05g0542800	Molecular Function: polygalacturonase activity (GO:0004650);	Biological Process: carbohydrate metabolic process (GO:0005975);
LOC_Os03g02240	Os03g0113500	unknown
LOC_Os01g52710	Os01g0727100	Cellular Component: Golgi membrane (GO:0000139);	Biological Process: pectin biosynthetic process (GO:0045489);	Molecular Function: polygalacturonate 4-alpha-galacturonosyltransferase activity (GO:0047262);	Biological Process: cell wall organization (GO:0071555);
LOC_Os04g43400	Os04g0513700	Molecular Function: hydrolase activity, hydrolyzing O-glycosyl compounds (GO:0004553);	Biological Process: carbohydrate metabolic process (GO:0005975);	Molecular Function: pectinesterase activity (GO:0030599);	Biological Process: cell wall modification (GO:0042545);	Molecular Function: aspartyl esterase activity (GO:0045330);
LOC_Os01g66850	Os01g0892600	Cellular Component: extracellular region (GO:0005576);	Cellular Component: cell wall (GO:0005618);	Molecular Function: hydrolase activity (GO:0016787);	Biological Process: cell wall organization (GO:0071555);
LOC_Os04g36770	Os04g0445300	unknown
LOC_Os10g10620	Os10g0185400	Molecular Function: enzyme inhibitor activity (GO:0004857);	Biological Process: negative regulation of catalytic activity (GO:0043086);
LOC_Os05g05640	Os05g0149000	Molecular Function: enzyme inhibitor activity (GO:0004857);
LOC_Os06g51160	Os06g0727300	Cellular Component: Golgi membrane (GO:0000139);	Biological Process: pectin biosynthetic process (GO:0045489);	Molecular Function: polygalacturonate 4-alpha-galacturonosyltransferase activity (GO:0047262);	Biological Process: cell wall organization (GO:0071555);
LOC_Os12g18560	Os12g0283400	Molecular Function: enzyme inhibitor activity (GO:0004857);	Biological Process: negative regulation of catalytic activity (GO:0043086);
LOC_Os03g28090	Os03g0399000	Cellular Component: integral component of membrane (GO:0016021);	Molecular Function: pectinesterase activity (GO:0030599);	Biological Process: cell wall modification (GO:0042545);	Molecular Function: aspartyl esterase activity (GO:0045330);	Biological Process: pectin catabolic process (GO:0045490);	Molecular Function: pectinesterase inhibitor activity (GO:0046910);
LOC_Os11g07090	Os11g0172100	Cellular Component: extracellular region (GO:0005576);	Cellular Component: cell wall (GO:0005618);	Molecular Function: pectinesterase activity (GO:0030599);	Biological Process: cell wall modification (GO:0042545);	Molecular Function: aspartyl esterase activity (GO:0045330);	Biological Process: pectin catabolic process (GO:0045490);	Molecular Function: pectinesterase inhibitor activity (GO:0046910);
LOC_Os01g53990	Os01g0743200	Molecular Function: pectinesterase activity (GO:0030599);	Biological Process: cell wall modification (GO:0042545);	Molecular Function: aspartyl esterase activity (GO:0045330);	Biological Process: pectin catabolic process (GO:0045490);	Molecular Function: carboxylic ester hydrolase activity (GO:0052689);
LOC_Os01g19440	Os01g0300100	Molecular Function: pectinesterase activity (GO:0030599);	Biological Process: cell wall modification (GO:0042545);	Molecular Function: aspartyl esterase activity (GO:0045330);	Biological Process: pectin catabolic process (GO:0045490);	Molecular Function: carboxylic ester hydrolase activity (GO:0052689);
LOC_Os04g51340	Os04g0602500	Cellular Component: extracellular region (GO:0005576);	Cellular Component: plant-type cell wall (GO:0009505);	Molecular Function: carboxylic ester hydrolase activity (GO:0052689);	Molecular Function: pectin acetylesterase activity (GO:0052793);	Biological Process: cell wall organization (GO:0071555);
LOC_Os02g46360	Os02g0689000	Molecular Function: enzyme inhibitor activity (GO:0004857);
LOC_Os08g25070	Os08g0338500	unknown
LOC_Os10g31910	Os10g0457200	Molecular Function: pectate lyase activity (GO:0030570);	Biological Process: pectin catabolic process (GO:0045490);	Molecular Function: metal ion binding (GO:0046872);
LOC_Os06g09340	Os06g0193200	Molecular Function: enzyme inhibitor activity (GO:0004857);	Molecular Function: pectinesterase activity (GO:0030599);	Biological Process: cell wall modification (GO:0042545);	Molecular Function: aspartyl esterase activity (GO:0045330);
LOC_Os07g49100	Os07g0691100	Molecular Function: enzyme inhibitor activity (GO:0004857);	Cellular Component: extracellular region (GO:0005576);	Cellular Component: cell wall (GO:0005618);	Molecular Function: pectinesterase activity (GO:0030599);	Biological Process: cell wall modification (GO:0042545);	Molecular Function: aspartyl esterase activity (GO:0045330);	Biological Process: pectin catabolic process (GO:0045490);
LOC_Os01g66840	Os01g0892500	Cellular Component: extracellular region (GO:0005576);	Cellular Component: cell wall (GO:0005618);	Molecular Function: hydrolase activity (GO:0016787);	Biological Process: cell wall organization (GO:0071555);
[truncated: 193 more columns]
