# Supplementary material for: A Comparative Analysis of Major Cell Wall Components and Associated Gene Expression in Autotetraploid and Its Donor Diploid Rice (Oryza sativa L.) under Blast and Salt Stress Conditions
Source: Plants (Basel). 2023 Nov 26;12(23):3976. doi: 10.3390/plants12233976 (PMC10708163; doi:10.3390/plants12233976)
Supplement: Supplementary file 1 [file plants-12-03976-s001.zip › Supplementary Table S2.xlsx]

## Sheet: Sheet1
	Fprimer	Rprimer
Os01g0639200	CACCGTGGACGGTGATGGCGAACGTG	GCAACGACGACGTGAAGACGC
Os09g0400000	GATCACGTCGAACGGCAAGG	GAGCATGGCCTGGCAGTCCC
Os10g0578200	TCGCCGCCGAACAAGATC	CGGACCACTTGATCTC
Os01g0312500	TGATACACATCAAGGCCGGG	TTGATGACGGTCTTGCCGAT
Os01g0788400	GGGGACAAGTTTGTACAAAAAAGCAGGCT	GGGGACCACTTTGTACAAGAAAGCTGGGT
Os02g0626100	GTCGGCATAGCTGAACACGG	AGAAGGTGCTCACCATGAACC
Os02g0738900	GCTCTAGAATGGAGGCCATGGACGAGCT	GCTCTAGATTAATATTTTTGCCCTGGAG
